# Supplementary material for: Meiofaunal communities and nematode diversity characterizing the Secca delle Fumose shallow vent area (Gulf of Naples, Italy)
Source: PeerJ. 2020 May 29;8:e9058. doi: 10.7717/peerj.9058 (PMC7263297; doi:10.7717/peerj.9058)
Supplement: Supplemental Information 1 — All replicates are shown. Note: some replicate layers are missing beacuse of technical reasons during the sampling. [file peerj-08-9058-s001.xlsx]

## Sheet:  S1
	Table S1: Meiofauna abundances (ind./10cm2) and meiofaunal number of higher taxa reported from the four sampling sites and characterizing the different sediment layers. All replicates are shown.
	Note: some replicate layers are missing beacuse of technical reasons during the sampling.
	Site	G1				G2				G3				H1				H2			H3
	Taxon	0-1 cm	1-3 cm	3-5 cm	5-10 cm	0-1 cm	1-3 cm	3-5 cm	5-10 cm	0-1 cm	1-3 cm	3-5 cm	5-10 cm	0-1 cm	1-3 cm	3-5 cm	5-10 cm	0-1 cm	1-3 cm	3-5 cm	0-1 cm	1-3 cm	3-5 cm	5-10 cm
	Nematoda	24	64.43	97.28	315.42	107.39	80.43	95.17	305.31	344.48	244.67	268.67	249.72	12.63	40.43	116.65	269.1	4.63	14.74	42.95	2.11	8.42	28.64	298.99
	Copepoda	26.95	7.58	28.64	93.49	41.27	25.27	41.69	149.5	389.54	82.54	52.64	67.8	88.01	135.18	77.91	56.85	32.01	33.27	15.16	68.64	121.28	97.28	21.9
	Nauplii	14.74	11.79	30.74	100.65	8	15.58	23.16	110.75	237.93	89.7	77.91	102.33	126.34	112.86	73.27	64.85	65.27	44.22	26.95	80.43	56.85	35.37	4.63
	Polychaeta	2.11	11.37	24	61.06	5.47	13.9	13.48	81.27	89.7	71.17	37.06	90.96	1.68	7.16	7.58	10.11	2.53	0.42	2.53	2.11	0.42	9.26	10.95
	Oligochaeta	0	2.11	2.11	2.53	3.37	0.84	0.42	2.95	0	0.42	0	0	0.84	0.42	0.42	0	0	0	0	0	0	0	0
	Bivalvia	0	0.42	0.42	0	0	0	0	2.11	3.79	1.26	0.84	0.84	2.53	3.79	3.79	0	1.26	0.84	0.84	2.95	1.26	0	0.42
	Gasteropoda	0	0	0	0.84	0.42	0	0	3.37	0.84	0.84	0.84	1.26	0	0	0	0	0.84	0	0	0	0	0	0
	Scaphopoda	0	0	0	0.42	0	0	0	0	0.84	0	0	0	0	0	0	0	0	0	0	0	0	0	0
	Polyplacophora	0	0	0	0	0	0	0	0	0	0	0.42	0.84	0	0	0	0	0	0	0	0	0	0	0
	Amphipoda	0.84	0	0	0	0.84	0	0.42	0.84	0.42	0	0	0	0	0	0	0	0	0	0	0	0.84	0	0
	Cumacea	0	0	0	0.42	0	0	0	1.26	0.84	0	0.42	0	0	0	0	0	0	0	0	0	0	0	0
	Isopoda	0	0	0	0	0	0	0	0.42	0	0	0	0	0	0	0	0	0	0	0	0	0	0	0
	Ostracoda	2.95	2.95	3.37	23.16	5.05	16	35.8	76.64	66.54	25.69	24.42	26.95	3.37	0.42	2.11	1.26	0.84	1.68	0	1.26	0.42	0	0
	Cladocera	0.42	0	0	0	0	0	0	2.11	0	0	0	0	0	0	0	0	0	0	0	0	0	0	0
	Halacarida	0.42	0	1.26	6.74	1.26	1.68	1.26	9.26	4.63	8.42	10.11	10.11	0	0.84	0	0.42	0	0.42	0.42	0.84	0.84	0.42	1.68
	Tanaidacea	0	0	0	0	0	0	0	0.84	1.26	0	0	0.42	0	0	0	0	0	0	0	0	0	0	0
	Kinorhyncha	0	0	0	0	0	0	0	0	0	0	0	0	0	0	0	0	0	0	0	0	0	0	0
	Gastrotricha	0	0	0	0	0.42	0	0	0	0	0	0	0	0	0	0	0.42	0	0	0	0	0	0	0
	Platyhelminthes	0	0.42	1.68	4.63	3.37	6.32	3.37	5.05	10.53	1.68	1.26	7.58	2.53	0	0	0	0	0	0	0	0	0.84	0
	Tardigrada	0	0	2.53	6.74	0.42	0	0	0.84	19.37	22.32	19.79	27.79	0	0	0	0	0	0	0	0	0	0	0
	Priapulida larvae	0.84	0	0	1.26	0	0	0	0	0	0	0	0	0	0	0	0	0	0	0	0	0	0	0
	Nemertea	0	0	0	0	0	0	0	0.84	0	0	0	0.42	0	0	0	0	0	0	0	0	0	0	0
	Sinpucula	0	1.68	1.26	2.95	1.26	0	1.68	0.84	12.63	5.9	2.95	3.79	0	0	0	0	0	0	0	0	0.42	0	0.42
	Chaetognatha	0	0	0	0.42	0	0	0	0	0	0	0	0	0	0	0	0	0	0	0	0	0	0	0
	Porifera	0	0	0	0	0	0	0	0	0	0	0	0	0	0	0	0	0.42	0	0	0	0	0	0
	Rotifera	0	0	0	0	0	0	0	0	0	0	1.68	0	0	0	0	0	0	0	0	0	0	0	0
	Cnidaria	0	0	0	0.42	0	0	0	0	0	0	0.42	1.26	0	0	0	0	0	0	0	0	0	0	0
	Foraminifera	19.79	6.74	11.79	34.53	2.11	6.74	12.63	115.81	24.42	149.5	146.97	210.98	18.53	14.74	16	10.53	12.21	11.79	14.74	1.26	1.26	3.37	1.68
	Ciliata	3.79	6.74	8.42	23.16	8.42	3.79	7.58	24	10.95	22.74	23.58	53.9	39.59	118.33	208.88	138.97	12.21	34.53	39.59	64.85	105.7	165.08	109.49
	total	96.85	116.23	213.5	678.84	189.07	170.55	236.66	894.01	1218.71	726.85	669.98	856.95	296.05	434.17	506.61	552.51	132.22	141.91	143.18	224.45	297.71	340.26	450.16
	n° taxa	10	10	12	17	14	9	11	19	16	13	16	16	9	9	8	9	9	8	7	8	10	7	8
	continue
	Site	CN1				CN2				CN3			CS1				CS2				CS3
	Taxon	0-1 cm	1-3 cm	3-5 cm	5-10 cm	0-1 cm	1-3 cm	3-5 cm	5-10 cm	0-1 cm	1-3 cm	3-5 cm	0-1 cm	1-3 cm	3-5 cm	5-10 cm	0-1 cm	1-3 cm	3-5 cm	5-10 cm	0-1 cm	1-3 cm	3-5 cm
	Nematoda	80.85	95.59	71.17	41.27	115.39	139.81	141.07	535.66	53.06	112.02	204.66	53.48	117.91	145.71	619.89	46.32	85.49	361.32	478.39	105.28	429.54	769.81
	Copepoda	191.19	22.74	8.84	7.16	65.27	31.58	16.42	31.58	73.7	37.48	24	35.8	6.32	5.47	24	24.42	12.21	26.95	93.07	115.39	109.91	26.53
	Nauplii	228.25	64.01	21.48	9.69	146.97	68.64	24.85	45.06	47.17	37.9	22.32	45.9	16.84	23.58	72.43	25.69	12.63	25.69	108.65	56.43	114.54	69.06
	Polychaeta	17.69	13.48	20.22	4.21	47.59	37.48	26.53	46.32	34.53	21.48	24.42	20.21	7.15	10.52	23.16	7.16	6.32	9.26	48.01	28.63	29.06	42.53
	Oligochaeta	0	0	0.42	0.84	1.68	0	0.42	2.95	0.42	0	0	0	0.42	0	2.11	0.42	0.42	1.68	0	0	1.26	7.16
	Bivalvia	2.53	2.11	0	0	2.11	0.84	0	5.05	0.84	0.84	0	0	0.84	1.68	0	1.26	0	0	2.11	0.84	6.74	1.26
	Gasteropoda	1.26	4.63	3.37	0	2.11	6.74	3.37	5.47	8.42	4.63	11.37	3.37	4.21	2.95	0	1.68	0.42	1.68	21.06	3.37	9.69	4.63
	Scaphopoda	0	0	0	0	0	0	0	0	0	0	0	0	0	0	0	0	0	0	0	0	0	0
	Polyplacophora	0	0	0	0	0	0	0	0	0	0	0	0	0	0	0	0	0	0	0	0	0	0
	Amphipoda	1.68	0	0	0	0.42	0.42	0	0	0	0	0	0	0	0	0	0	0	0	2.1	0	0	0
	Cumacea	0.84	1.26	0	0	0	0	0	0	0.42	0	0	0	0	0	0	0	0	0	0	0.42	0.42	0
	Isopoda	0.42	0	0	0	0	0	0	0	0	0	0	0	0	0	1.26	0.42	0	0	0.42	0	0	0
	Ostracoda	24.42	15.58	3.37	0.84	18.95	23.58	16.42	11.37	19.79	6.74	12.21	5.05	2.95	2.11	15.58	2.11	0.84	0.84	18.53	15.58	14.74	4.21
	Cladocera	0	0	0	0	0	0	0	0	0	0	0	0	0	0	0	0	0	0	0.84	0	0	0
	Halacarida	5.05	1.26	2.11	0	7.16	3.79	2.95	7.16	4.21	5.47	5.9	2.53	2.11	2.11	2.95	0.42	0	0	9.69	1.68	11.37	8
	Tanaidacea	0.42	0	0	0	0	0	0	0	0.42	0	0	0.42	1.26	0	0	0.42	0	0	0	0	0	0.84
	Kinorhyncha	0	0	0	0	0	0	0	0	0	0	0	0	0	0	0	0	0	0	0	0.42	0	0
	Gastrotricha	0	0	0	0	0	0	0	0	0	0	0	0	0	0	1.26	0	0	0	0	4.63	2.95	5.47
	Platyhelminthes	1.68	1.68	1.26	1.26	0	0.84	0.84	1.26	2.95	0.84	2.11	0.84	1.68	5.05	2.11	0.42	0.42	1.68	0.84	0.42	0	2.11
	Tardigrada	0.84	0.84	2.11	0.84	6.74	2.95	1.26	0	24	28.64	10.53	0	0	0	0	0.42	0	0	0.84	1.68	0.84	0
	Priapulida larvae	0	0	0	0	0	0	0	0	0	0	0	0	0	0	0	0	0	0	0	0	0	0
	Nemertea	0	0	0	0	0	0	0	0	0	0	0	0	0	0	0	0.42	0	0.42	0	0	0	0
	Sinpucula	0.42	2.11	0	0	0	0.42	0	0	0.84	0.84	0	0	0	0	0.84	0.42	0	0	0.84	0	0	1.26
	Chaetognatha	0	0	0	0	0	0	0	0	0	0	0	0	0	0	0	0	0	0	0	0	0	0
	Porifera	0	0	0	0	0	0	0	0	0	0	0	0	0	0	0	0	0	0	0	0	0	0
	Rotifera	0	0	0	0	0	0	0	0	0	0	0	0	0	0	0	0	0	0	0	0.84	0	0
	Cnidaria	0	0	0.42	0	0	0	0	0	0	0	0	0	0	0	0	0	0	0	0	0	0	0
	Foraminifera	35.8	22.32	4.63	3.37	48.85	70.75	57.69	25.69	51.8	71.17	45.06	25.27	22.74	25.69	44.22	23.58	10.95	24	101.49	61.9	194.98	84.64
	Ciliata	6.74	15.58	10.11	6.32	8.42	10.95	5.47	18.53	2.95	10.53	8.42	4.63	4.63	4.63	28.21	7.16	11.79	5.9	9.26	1.26	4.63	13.9
	total	600.08	263.19	149.51	75.8	471.66	398.79	297.29	736.1	325.52	338.58	371	197.5	189.06	229.5	838.02	142.74	141.49	459.42	896.14	398.77	930.67	1041.41
	n° taxa	16	13	12	8	12	13	11	11	15	12	10	10	12	10	12	16	9	10	15	15	13	14
